# Supplementary material
Source: publisher site journal article supplement (https://thieme-connect.com/media/10.1055-s-00035023/201606/supmat/10-3415-vcot-15-11-0184-supp.pdf)
Supplement: Supplementary file 1 [file 10-3415-vcot-15-11-0184-supp.pdf]

Online Supplementary Material to:

# Tibial plateau levelling osteotomy in eleven cats with cranial cruciate ligament rupture

Julia K. Mindner; Malgorzata J. Bielecki; Stefan Scharvogel; Diane Meiler

Vet Comp Orthop Traumatol 2016; 29:

<http://dx.doi.org/10.3415/VCOT-15-11-0184>

**Supplementary Table 1:** Patient description, history, osteoarthritis score, and mean preoperative (Pre-op) and postoperative (Post-op) tibial plateau angle (TPA) of all cats included in the study.

| Nr. | Breed       | Age (yrs) | Weight (Kg) | Sex    | Limb  | Lameness, Grade                     | Osteoarthritis, 10 score | Post-op osteoarthritis | Pre-op TPA | Post-op TPA |
|-----|-------------|-----------|-------------|--------|-------|-------------------------------------|--------------------------|------------------------|------------|-------------|
| 1   | DSH         | 12        | 4.8         | Male   | Right | Acute (1 day), 3                    | 7                        | 7                      | 31°        | 15°         |
| 2   | DSH         | 9         | 4.0         | Female | Right | Acute (3-4 days), 3                 | 4                        | 4                      | 31°        | 12°         |
| 3   | Savannah    | 3         | 5.5         | Male   | Left  | Chronic (months), 3                 | 6                        | 7                      | 24°        | 6°          |
| 4   | DSH         | 10        | 11.0        | Male   | Right | Acute (1 day), 4                    | 3                        | 3                      | 32°        | 14°         |
| 5   | DSH         | 8         | 5.5         | Male   | Right | Acute (1 day),                      | 4                        | 4                      | 24°        | 7°          |
| 6   | DSH         | 13        | 3.9         | Female | Left  | Chronic (months), 3                 | 7                        | 7                      | 24°        | 9°          |
| 7   | DSH         | 10        | 3.8         | Female | Left  | Acute (days), 3                     | 7                        | 7                      | 25°        | 4°          |
| 8   | Turkish Van | 5         | 6.9         | Male   | Right | Chronic (two previous surgeries), 4 | 7                        | 7                      | 25°        | 9°          |
| 9   | DSH         | 9         | 5.5         | Female | Right | Acute (1 day), 4                    | 5                        | 5                      | 27°        | 9°          |
| 10  | DSH         | 8         | 4.7         | Female | Right | Acute (1 day), 3                    | 7                        | 10                     | 27°        | 9°          |
| 11  | DSH         | 6         | 6.7         | Male   | Right | Acute (1 day), 3                    | 9                        | 10                     | 29°        | -2°         |

Nr. = number; DSH = Domestic Shorthaired Cat; yrs = years).
